# Supplementary material for: Protein Recovery of Tra Catfish (Pangasius hypophthalmus) Protein-Rich Side Streams by the pH-Shift Method
Source: MDPI journal article supplement (doi:10.3390/foods11111531), 2022-05-24
Supplement: s1 [file s1]

**Table S1. List of abbreviations**

| <b>Abbreviation</b> | <b>Meaning</b>                                                                       |
|---------------------|--------------------------------------------------------------------------------------|
| ACO                 | Abdominal cut-offs                                                                   |
| ACO-FPI             | Fish protein isolate produced from the abdominal cut-off                             |
| DM-FPI              | Fish protein isolate produced from the dark muscle                                   |
| HBB                 | Head and backbone blend                                                              |
| HBB-FPI             | Fish protein isolate produced from the head and backbone blend                       |
| FPI                 | Fish protein isolate                                                                 |
| FPI-DMR             | Dry matter recovery of the fish protein isolate compared to the initial raw material |
| FPI-PR              | Protein recovery of the fish protein isolate compared to the initial raw material    |
| LC-MS               | Liquid chromatography-mass spectrometry                                              |
| PES                 | Protein extraction solution                                                          |
| PER                 | Protein extractable recovery                                                         |
| PI                  | Isoelectric protein point                                                            |
| SDS-PAGE            | Sodium dodecyl sulfate-Polyacrylamide gel electrophoresis                            |
